# Supplementary material
Source: PubMed Central journal article supplement (PMC7050113)

Supplementary Table 1. Characteristics of all samples used in this study.

Supplementary Figure 1. The reproducibility of the ELISA tests for detection of TRIM33-IgA and CTAG1A-IgG. A. Repeatability in the same batch. B. batch-to-batch reproducibility. The results shown represent the mean and standard deviation of 10 experiments. C. Scatter plot of the repeat TRIM33-IgA signals across batches. D. Scatter plot of the repeat CTAG1A-IgG signals across batches.

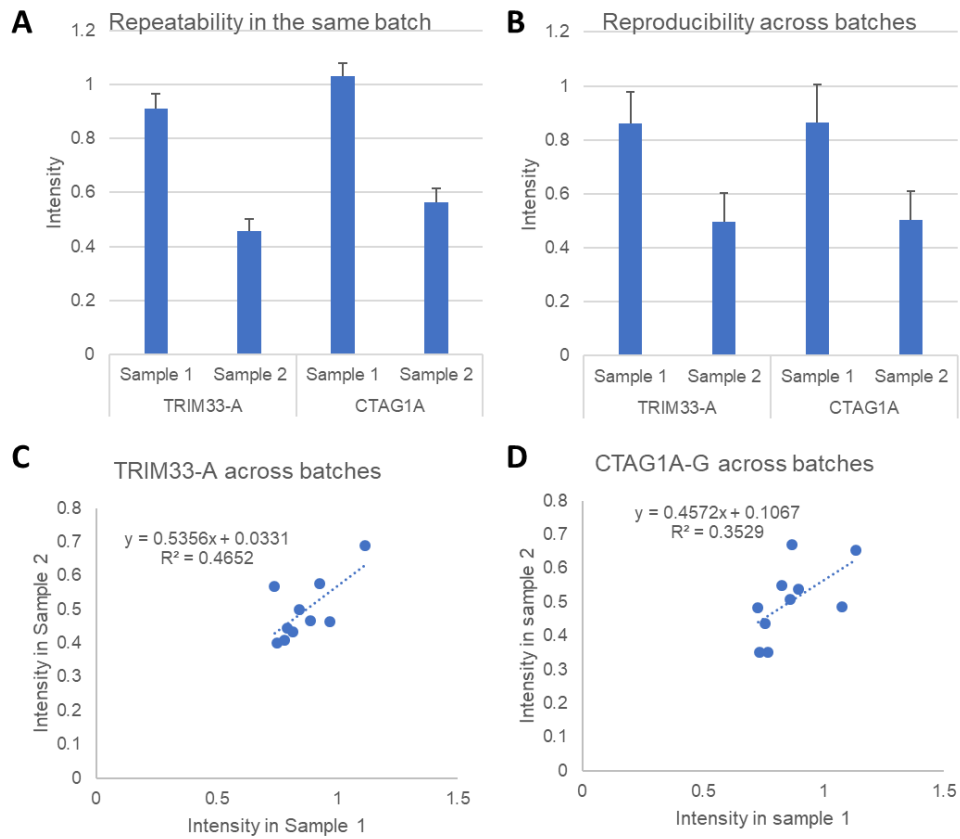

Supplement: 157665_0_supp_445096_q2ml4r.pdf [file 157665_0_supp_445096_q2ml4r.pdf]
